# Supplementary material
Source: publisher figshare collection journal article supplement (https://acs.figshare.com/ndownloader/files/4495027)
Supplement: Supplementary file 1 [file 4495027]

 
data_[rh(c6h4pph2)(trop2pph)] 
_publ_requested_journal          'J. Am. Chem. Soc.'
_publ_contact_author_name        'Hansjoerg Gruetzmacher'
_publ_contact_author_address     
;Department of Chemistry and Applied Biosciences
ETH Zurich
Wolfgang Pauli Str. 10
CH-8093 Zurich
Switzerland
;
_publ_contact_author_email       gruetzmacher@inorg.chem.ethz.ch
_publ_contact_author_phone       '+41 44 632 28 55'
_publ_contact_author_fax         '+41 44 633 14 18'
loop_
_publ_author_name
_publ_author_address
'Puschmann, Florian F.'
;Department of Chemistry and Applied Biosciences
ETH Zurich
Wolfgang Pauli Str. 10
CH-8093 Zurich
Switzerland
;
'de Bruin, Bas'
;Universiteit van Amsterdam
Faculty of Science
Van 't Hoff Institute for Molecular Sciences
Homogeneous and Supramolecular Catalysis
Nieuwe Achtergracht 166
1018 WV Amsterdam
The Netherlands
;
'Gruetzmacher, Hansjoerg'
;Department of Chemistry and Applied Biosciences
ETH Zurich
Wolfgang Pauli Str. 10
CH-8093 Zurich
Switzerland
; 
_audit_creation_method            SHELXL-97 
_chemical_name_systematic 
; 
 ? 
; 
_chemical_name_common             [Rh((C6H4)PPh2)(trop2PPh)] 
_chemical_melting_point           250 
_chemical_formula_moiety          '2(C54 H41 P2 Rh), C4 H10 O' 
_chemical_formula_sum 
 'C112 H92 O P4 Rh2' 
_chemical_formula_weight          1783.56 
 
loop_ 
 _atom_type_symbol 
 _atom_type_description 
 _atom_type_scat_dispersion_real 
 _atom_type_scat_dispersion_imag 
 _atom_type_scat_source 
 'C'  'C'   0.0033   0.0016 
 'International Tables Vol C Tables 4.2.6.8 and 6.1.1.4' 
 'H'  'H'   0.0000   0.0000 
 'International Tables Vol C Tables 4.2.6.8 and 6.1.1.4' 
 'P'  'P'   0.1023   0.0942 
 'International Tables Vol C Tables 4.2.6.8 and 6.1.1.4' 
 'Rh'  'Rh'  -1.1178   0.9187 
 'International Tables Vol C Tables 4.2.6.8 and 6.1.1.4' 
 'O'  'O'   0.0106   0.0060 
 'International Tables Vol C Tables 4.2.6.8 and 6.1.1.4' 
 
_symmetry_cell_setting            triclinic 
_symmetry_space_group_name_H-M    P-1 
 
loop_ 
 _symmetry_equiv_pos_as_xyz 
 'x, y, z' 
 '-x, -y, -z' 
 
_cell_length_a                    12.245(3) 
_cell_length_b                    14.106(3) 
_cell_length_c                    15.104(3) 
_cell_angle_alpha                 63.58(3) 
_cell_angle_beta                  78.33(3) 
_cell_angle_gamma                 66.59(3) 
_cell_volume                      2143.1(8) 
_cell_formula_units_Z             1 
_cell_measurement_temperature     200(2) 
_cell_measurement_reflns_used     10598 
_cell_measurement_theta_min       1.7 
_cell_measurement_theta_max       28.32 
 
_exptl_crystal_description        'undef' 
_exptl_crystal_colour             'yellow'
_exptl_crystal_size_max           0.12 
_exptl_crystal_size_mid           0.10 
_exptl_crystal_size_min           0.05 
_exptl_crystal_density_meas       ? 
_exptl_crystal_density_diffrn     1.382 
_exptl_crystal_density_method     'not measured' 
_exptl_crystal_F_000              922 
_exptl_absorpt_coefficient_mu     0.513 
_exptl_absorpt_correction_type    empirical 
_exptl_absorpt_correction_T_min   0.9410 
_exptl_absorpt_correction_T_max   0.9748 
_exptl_absorpt_process_details    'SADABS 2008/1, Bruker'  
 
_exptl_special_details 
; 

; 
 
_diffrn_ambient_temperature       200(2) 
_diffrn_radiation_wavelength      0.71070 
_diffrn_radiation_type            MoK\a 
_diffrn_radiation_source          'fine-focus sealed tube' 
_diffrn_radiation_monochromator   graphite 
_diffrn_measurement_device_type   'Bruker Apex' 
_diffrn_measurement_method        '\f scans and \w scans' 
_diffrn_detector_area_resol_mean  ? 
_diffrn_standards_number          22493 
_diffrn_standards_interval_count  ? 
_diffrn_standards_interval_time   15 
_diffrn_standards_decay_%         ? 
_diffrn_reflns_number             22493 
_diffrn_reflns_av_R_equivalents   0.0421 
_diffrn_reflns_av_sigmaI/netI     0.0606 
_diffrn_reflns_limit_h_min        -16 
_diffrn_reflns_limit_h_max        16 
_diffrn_reflns_limit_k_min        -18 
_diffrn_reflns_limit_k_max        18 
_diffrn_reflns_limit_l_min        -20 
_diffrn_reflns_limit_l_max        20 
_diffrn_reflns_theta_min          1.51 
_diffrn_reflns_theta_max          28.31 
_reflns_number_total              10598 
_reflns_number_gt                 8995 
_reflns_threshold_expression      >2sigma(I) 
 
_computing_data_collection        'Bruker SMART' 
_computing_cell_refinement        'Bruker SMART' 
_computing_data_reduction         'Bruker SAINT' 
_computing_structure_solution     'SHELXS-97 (Sheldrick, 1990)' 
_computing_structure_refinement   'SHELXL-97 (Sheldrick, 1997)' 
_computing_molecular_graphics     'Ortep32 for Windows' 
_computing_publication_material   'Bruker SHELXTL' 
 
_refine_special_details 
; 
 Refinement of F^2^ against ALL reflections.  The weighted R-factor wR and 
 goodness of fit S are based on F^2^, conventional R-factors R are based 
 on F, with F set to zero for negative F^2^. The threshold expression of 
 F^2^ > 2sigma(F^2^) is used only for calculating R-factors(gt) etc. and is 
 not relevant to the choice of reflections for refinement.  R-factors based 
 on F^2^ are statistically about twice as large as those based on F, and R- 
 factors based on ALL data will be even larger.
One strongly disordered diethylether solvent molecule was found in the structure. 
The diethylether molecule was described by 6.6 carbon atoms(C55-C61), which corresponds to 39.6 electrons
(one diethylether molecule contains 42 electrons). 
; 
 
_refine_ls_structure_factor_coef  Fsqd  
_refine_ls_matrix_type            full 
_refine_ls_weighting_scheme       calc  
_refine_ls_weighting_details 
 'calc w=1/[\s^2^(Fo^2^)+(0.0364P)^2^+0.0000P] where P=(Fo^2^+2Fc^2^)/3' 
_atom_sites_solution_primary      direct 
_atom_sites_solution_secondary    difmap 
_atom_sites_solution_hydrogens    geom 
_refine_ls_hydrogen_treatment     undef 
_refine_ls_extinction_method      none 
_refine_ls_extinction_coef        ? 
_refine_ls_number_reflns          10598 
_refine_ls_number_parameters      543 
_refine_ls_number_restraints      0 
_refine_ls_R_factor_all           0.0493 
_refine_ls_R_factor_gt            0.0392 
_refine_ls_wR_factor_ref          0.0857 
_refine_ls_wR_factor_gt           0.0814 
_refine_ls_goodness_of_fit_ref    0.990 
_refine_ls_restrained_S_all       0.990 
_refine_ls_shift/su_max           0.002 
_refine_ls_shift/su_mean          0.000 
 
loop_ 
 _atom_site_label 
 _atom_site_type_symbol 
 _atom_site_fract_x 
 _atom_site_fract_y 
 _atom_site_fract_z 
 _atom_site_U_iso_or_equiv 
 _atom_site_adp_type 
 _atom_site_occupancy 
 _atom_site_symmetry_multiplicity 
 _atom_site_calc_flag 
 _atom_site_refinement_flags 
 _atom_site_disorder_assembly 
 _atom_site_disorder_group 
Rh1 Rh 0.885736(15) 0.567719(14) 0.701651(12) 0.01883(6) Uani 1 1 d . . . 
P1 P 0.69369(5) 0.58239(5) 0.75133(4) 0.02043(12) Uani 1 1 d . . . 
P2 P 0.92564(5) 0.73499(5) 0.66006(4) 0.02188(13) Uani 1 1 d . . . 
C1 C 0.69442(19) 0.46336(18) 0.87503(16) 0.0223(5) Uani 1 1 d . . . 
H1 H 0.6117 0.4617 0.8919 0.027 Uiso 1 1 calc R . . 
C2 C 0.7773(2) 0.34817(19) 0.88124(16) 0.0246(5) Uani 1 1 d . . . 
C3 C 0.8999(2) 0.32539(19) 0.85979(16) 0.0243(5) Uani 1 1 d . . . 
C4 C 0.9577(2) 0.40922(18) 0.82922(16) 0.0229(5) Uani 1 1 d . . . 
H4 H 1.0461 0.3746 0.8222 0.028 Uiso 1 1 calc R . . 
C5 C 0.92594(19) 0.49931(18) 0.85850(16) 0.0218(5) Uani 1 1 d . . . 
H5 H 0.9978 0.5117 0.8663 0.026 Uiso 1 1 calc R . . 
C6 C 0.83002(19) 0.52239(18) 0.93146(16) 0.0220(5) Uani 1 1 d . . . 
C7 C 0.7257(2) 0.49740(18) 0.94654(16) 0.0232(5) Uani 1 1 d . . . 
C8 C 0.7320(2) 0.2616(2) 0.91083(17) 0.0321(6) Uani 1 1 d . . . 
H8 H 0.6493 0.2765 0.9261 0.038 Uiso 1 1 calc R . . 
C9 C 0.8055(3) 0.1543(2) 0.91834(19) 0.0403(7) Uani 1 1 d . . . 
H9 H 0.7734 0.0962 0.9395 0.048 Uiso 1 1 calc R . . 
C10 C 0.9254(3) 0.1322(2) 0.89501(19) 0.0403(7) Uani 1 1 d . . . 
H10 H 0.9760 0.0591 0.8990 0.048 Uiso 1 1 calc R . . 
C11 C 0.9714(2) 0.2171(2) 0.86579(17) 0.0320(6) Uani 1 1 d . . . 
H11 H 1.0540 0.2014 0.8493 0.038 Uiso 1 1 calc R . . 
C12 C 0.8451(2) 0.5685(2) 0.99131(17) 0.0274(5) Uani 1 1 d . . . 
H12 H 0.9126 0.5902 0.9796 0.033 Uiso 1 1 calc R . . 
C13 C 0.7648(2) 0.5832(2) 1.06678(19) 0.0357(6) Uani 1 1 d . . . 
H13 H 0.7776 0.6142 1.1066 0.043 Uiso 1 1 calc R . . 
C14 C 0.6660(2) 0.5528(2) 1.08430(19) 0.0383(6) Uani 1 1 d . . . 
H14 H 0.6117 0.5602 1.1375 0.046 Uiso 1 1 calc R . . 
C15 C 0.6466(2) 0.5114(2) 1.02360(17) 0.0307(5) Uani 1 1 d . . . 
H15 H 0.5776 0.4920 1.0349 0.037 Uiso 1 1 calc R . . 
C16 C 0.6193(2) 0.57179(19) 0.66214(16) 0.0237(5) Uani 1 1 d . . . 
H16 H 0.5350 0.5796 0.6856 0.028 Uiso 1 1 calc R . . 
C17 C 0.6191(2) 0.66858(19) 0.56293(17) 0.0252(5) Uani 1 1 d . . . 
C18 C 0.7259(2) 0.68250(19) 0.51420(16) 0.0252(5) Uani 1 1 d . . . 
C19 C 0.8459(2) 0.60702(19) 0.55289(16) 0.0238(5) Uani 1 1 d . . . 
H19 H 0.9097 0.6281 0.5040 0.029 Uiso 1 1 calc R . . 
C20 C 0.8806(2) 0.48790(19) 0.60801(16) 0.0231(5) Uani 1 1 d . . . 
H20 H 0.9628 0.4483 0.5877 0.028 Uiso 1 1 calc R . . 
C21 C 0.8039(2) 0.41995(19) 0.63368(16) 0.0244(5) Uani 1 1 d . . . 
C22 C 0.6814(2) 0.45759(19) 0.65638(16) 0.0241(5) Uani 1 1 d . . . 
C23 C 0.5110(2) 0.7445(2) 0.51850(19) 0.0344(6) Uani 1 1 d . . . 
H23 H 0.4390 0.7350 0.5517 0.041 Uiso 1 1 calc R . . 
C24 C 0.5060(3) 0.8334(2) 0.4272(2) 0.0438(7) Uani 1 1 d . . . 
H24 H 0.4314 0.8839 0.3981 0.053 Uiso 1 1 calc R . . 
C25 C 0.6099(3) 0.8482(2) 0.3788(2) 0.0425(7) Uani 1 1 d . . . 
H25 H 0.6072 0.9091 0.3162 0.051 Uiso 1 1 calc R . . 
C26 C 0.7181(2) 0.7741(2) 0.42170(18) 0.0324(6) Uani 1 1 d . . . 
H26 H 0.7891 0.7854 0.3878 0.039 Uiso 1 1 calc R . . 
C27 C 0.8562(2) 0.3115(2) 0.63479(17) 0.0294(5) Uani 1 1 d . . . 
H27 H 0.9395 0.2832 0.6218 0.035 Uiso 1 1 calc R . . 
C28 C 0.7898(3) 0.2442(2) 0.65433(19) 0.0366(6) Uani 1 1 d . . . 
H28 H 0.8275 0.1706 0.6550 0.044 Uiso 1 1 calc R . . 
C29 C 0.6688(3) 0.2842(2) 0.67283(19) 0.0384(6) Uani 1 1 d . . . 
H29 H 0.6224 0.2393 0.6843 0.046 Uiso 1 1 calc R . . 
C30 C 0.6152(2) 0.3899(2) 0.67461(18) 0.0318(6) Uani 1 1 d . . . 
H30 H 0.5320 0.4167 0.6885 0.038 Uiso 1 1 calc R . . 
C31 C 0.5814(2) 0.69790(18) 0.78026(16) 0.0236(5) Uani 1 1 d . . . 
C32 C 0.6190(2) 0.7696(2) 0.79672(18) 0.0309(5) Uani 1 1 d . . . 
H32 H 0.6998 0.7648 0.7830 0.037 Uiso 1 1 calc R . . 
C33 C 0.5405(3) 0.8477(2) 0.8327(2) 0.0406(7) Uani 1 1 d . . . 
H33 H 0.5672 0.8967 0.8429 0.049 Uiso 1 1 calc R . . 
C34 C 0.4234(3) 0.8544(2) 0.8537(2) 0.0430(7) Uani 1 1 d . . . 
H34 H 0.3696 0.9075 0.8790 0.052 Uiso 1 1 calc R . . 
C35 C 0.3845(2) 0.7841(2) 0.83814(19) 0.0378(6) Uani 1 1 d . . . 
H35 H 0.3038 0.7886 0.8531 0.045 Uiso 1 1 calc R . . 
C36 C 0.4624(2) 0.7066(2) 0.80072(17) 0.0299(5) Uani 1 1 d . . . 
H36 H 0.4345 0.6594 0.7890 0.036 Uiso 1 1 calc R . . 
C37 C 1.0759(2) 0.65249(19) 0.63838(16) 0.0241(5) Uani 1 1 d . . . 
C38 C 1.06197(19) 0.55089(19) 0.65749(15) 0.0215(5) Uani 1 1 d . . . 
C39 C 1.1633(2) 0.4640(2) 0.64698(17) 0.0268(5) Uani 1 1 d . . . 
H39 H 1.1573 0.3941 0.6593 0.032 Uiso 1 1 calc R . . 
C40 C 1.2721(2) 0.4786(2) 0.61889(18) 0.0317(6) Uani 1 1 d . . . 
H40 H 1.3398 0.4189 0.6113 0.038 Uiso 1 1 calc R . . 
C41 C 1.2836(2) 0.5800(2) 0.60161(19) 0.0335(6) Uani 1 1 d . . . 
H41 H 1.3590 0.5888 0.5827 0.040 Uiso 1 1 calc R . . 
C42 C 1.1854(2) 0.6677(2) 0.61202(18) 0.0322(6) Uani 1 1 d . . . 
H42 H 1.1926 0.7367 0.6014 0.039 Uiso 1 1 calc R . . 
C43 C 0.9314(2) 0.79186(19) 0.74627(17) 0.0261(5) Uani 1 1 d . . . 
C44 C 1.0246(2) 0.7349(2) 0.81222(18) 0.0324(6) Uani 1 1 d . . . 
H44 H 1.0886 0.6707 0.8084 0.039 Uiso 1 1 calc R . . 
C45 C 1.0234(3) 0.7725(2) 0.88325(19) 0.0423(7) Uani 1 1 d . . . 
H45 H 1.0866 0.7334 0.9281 0.051 Uiso 1 1 calc R . . 
C46 C 0.9320(3) 0.8655(2) 0.8894(2) 0.0465(8) Uani 1 1 d . . . 
H46 H 0.9315 0.8898 0.9389 0.056 Uiso 1 1 calc R . . 
C47 C 0.8408(3) 0.9237(2) 0.8236(2) 0.0437(7) Uani 1 1 d . . . 
H47 H 0.7783 0.9890 0.8270 0.052 Uiso 1 1 calc R . . 
C48 C 0.8401(2) 0.8871(2) 0.75237(18) 0.0327(6) Uani 1 1 d . . . 
H48 H 0.7769 0.9273 0.7074 0.039 Uiso 1 1 calc R . . 
C49 C 0.8723(2) 0.86148(19) 0.54771(16) 0.0256(5) Uani 1 1 d . . . 
C50 C 0.9499(3) 0.9075(2) 0.4772(2) 0.0424(7) Uani 1 1 d . . . 
H50 H 1.0332 0.8724 0.4869 0.051 Uiso 1 1 calc R . . 
C51 C 0.9069(3) 1.0037(3) 0.3932(2) 0.0575(9) Uani 1 1 d . . . 
H51 H 0.9610 1.0340 0.3451 0.069 Uiso 1 1 calc R . . 
C52 C 0.7874(3) 1.0559(2) 0.3785(2) 0.0525(8) Uani 1 1 d . . . 
H52 H 0.7584 1.1232 0.3211 0.063 Uiso 1 1 calc R . . 
C53 C 0.7088(3) 1.0110(2) 0.4469(2) 0.0454(7) Uani 1 1 d . . . 
H53 H 0.6257 1.0470 0.4363 0.055 Uiso 1 1 calc R . . 
C54 C 0.7508(2) 0.9133(2) 0.53124(19) 0.0353(6) Uani 1 1 d . . . 
H54 H 0.6965 0.8818 0.5778 0.042 Uiso 1 1 calc R . . 
C55 C 0.4294(11) 0.0898(10) 0.9388(9) 0.108(3) Uiso 0.6766(19) 1 d P . . 
C56 C 0.376(4) 0.1748(19) 0.8573(17) 0.1077(19) Uiso 0.307(18) 1 d P . . 
C57 C 0.4573(5) 0.0044(7) 0.9962(5) 0.1077(19) Uiso 0.939(11) 1 d P . . 
C58 C 0.3161(19) 0.1566(13) 0.8835(13) 0.1077(19) Uiso 0.387(17) 1 d P . . 
C59 C 0.4445(16) 0.1685(11) 0.8646(9) 0.1077(19) Uiso 0.565(19) 1 d P . . 
C60 C 0.331(7) 0.131(7) 0.988(6) 0.1077(19) Uiso 0.068(9) 1 d P . . 
C61 C 0.494(2) 0.097(2) 0.9179(18) 0.1077(19) Uiso 0.290(14) 1 d P . . 
 
loop_ 
 _atom_site_aniso_label 
 _atom_site_aniso_U_11 
 _atom_site_aniso_U_22 
 _atom_site_aniso_U_33 
 _atom_site_aniso_U_23 
 _atom_site_aniso_U_13 
 _atom_site_aniso_U_12 
Rh1 0.01904(9) 0.01976(9) 0.01925(9) -0.00927(7) 0.00093(6) -0.00747(7) 
P1 0.0202(3) 0.0223(3) 0.0204(3) -0.0101(2) 0.0001(2) -0.0078(2) 
P2 0.0232(3) 0.0204(3) 0.0226(3) -0.0088(2) -0.0005(2) -0.0082(2) 
C1 0.0224(11) 0.0264(12) 0.0204(11) -0.0091(9) 0.0029(9) -0.0128(10) 
C2 0.0340(13) 0.0242(12) 0.0181(11) -0.0072(9) -0.0019(9) -0.0137(10) 
C3 0.0305(13) 0.0222(11) 0.0180(11) -0.0061(9) -0.0036(9) -0.0081(10) 
C4 0.0209(11) 0.0233(11) 0.0214(11) -0.0074(9) -0.0024(9) -0.0057(9) 
C5 0.0213(11) 0.0244(11) 0.0208(11) -0.0080(9) -0.0024(9) -0.0095(9) 
C6 0.0236(11) 0.0202(11) 0.0174(11) -0.0040(9) -0.0031(9) -0.0060(9) 
C7 0.0256(12) 0.0228(11) 0.0198(11) -0.0075(9) -0.0017(9) -0.0081(10) 
C8 0.0423(15) 0.0333(14) 0.0258(13) -0.0096(11) 0.0007(11) -0.0218(12) 
C9 0.063(2) 0.0297(14) 0.0349(15) -0.0099(12) -0.0009(13) -0.0264(14) 
C10 0.062(2) 0.0210(13) 0.0348(15) -0.0092(11) -0.0065(13) -0.0121(13) 
C11 0.0392(15) 0.0261(13) 0.0264(13) -0.0104(10) -0.0044(11) -0.0061(11) 
C12 0.0257(12) 0.0294(13) 0.0293(13) -0.0137(10) -0.0046(10) -0.0081(10) 
C13 0.0338(14) 0.0449(16) 0.0371(15) -0.0277(13) -0.0053(11) -0.0074(12) 
C14 0.0347(15) 0.0561(18) 0.0292(14) -0.0264(13) 0.0056(11) -0.0136(13) 
C15 0.0253(13) 0.0399(14) 0.0265(13) -0.0144(11) 0.0026(10) -0.0115(11) 
C16 0.0196(11) 0.0292(12) 0.0251(12) -0.0122(10) -0.0009(9) -0.0098(10) 
C17 0.0310(13) 0.0235(12) 0.0247(12) -0.0125(10) -0.0053(10) -0.0077(10) 
C18 0.0323(13) 0.0265(12) 0.0210(11) -0.0136(10) -0.0015(9) -0.0095(10) 
C19 0.0271(12) 0.0289(12) 0.0194(11) -0.0131(10) 0.0028(9) -0.0115(10) 
C20 0.0229(12) 0.0273(12) 0.0236(12) -0.0154(10) 0.0029(9) -0.0092(10) 
C21 0.0309(13) 0.0274(12) 0.0195(11) -0.0110(10) -0.0018(9) -0.0123(10) 
C22 0.0305(13) 0.0268(12) 0.0186(11) -0.0094(9) -0.0028(9) -0.0124(10) 
C23 0.0310(14) 0.0368(14) 0.0379(15) -0.0194(12) -0.0077(11) -0.0063(12) 
C24 0.0466(17) 0.0356(15) 0.0408(16) -0.0144(13) -0.0207(13) 0.0016(13) 
C25 0.061(2) 0.0304(14) 0.0274(14) -0.0053(11) -0.0120(13) -0.0097(14) 
C26 0.0454(16) 0.0267(13) 0.0260(13) -0.0106(10) -0.0023(11) -0.0130(12) 
C27 0.0337(14) 0.0294(13) 0.0269(13) -0.0132(10) -0.0005(10) -0.0107(11) 
C28 0.0550(18) 0.0270(13) 0.0341(14) -0.0150(11) 0.0010(12) -0.0186(13) 
C29 0.0520(18) 0.0415(16) 0.0362(15) -0.0164(12) 0.0029(13) -0.0317(14) 
C30 0.0332(14) 0.0390(14) 0.0300(13) -0.0145(11) -0.0012(11) -0.0187(12) 
C31 0.0251(12) 0.0226(11) 0.0194(11) -0.0078(9) -0.0008(9) -0.0055(10) 
C32 0.0316(14) 0.0285(13) 0.0330(14) -0.0143(11) 0.0060(11) -0.0120(11) 
C33 0.0481(17) 0.0343(15) 0.0449(17) -0.0232(13) 0.0068(13) -0.0156(13) 
C34 0.0482(18) 0.0325(15) 0.0364(15) -0.0185(12) 0.0079(13) -0.0018(13) 
C35 0.0251(13) 0.0441(16) 0.0326(14) -0.0147(12) 0.0015(11) -0.0030(12) 
C36 0.0268(13) 0.0337(13) 0.0281(13) -0.0129(11) -0.0010(10) -0.0089(11) 
C37 0.0234(12) 0.0237(12) 0.0237(12) -0.0089(9) -0.0009(9) -0.0076(10) 
C38 0.0222(11) 0.0260(12) 0.0181(11) -0.0091(9) 0.0001(9) -0.0103(9) 
C39 0.0280(12) 0.0274(12) 0.0286(12) -0.0151(10) 0.0007(10) -0.0096(10) 
C40 0.0222(12) 0.0364(14) 0.0340(14) -0.0175(11) -0.0009(10) -0.0040(11) 
C41 0.0227(13) 0.0401(15) 0.0389(15) -0.0144(12) -0.0002(11) -0.0144(11) 
C42 0.0307(14) 0.0326(14) 0.0378(14) -0.0128(11) -0.0001(11) -0.0177(11) 
C43 0.0348(13) 0.0249(12) 0.0230(12) -0.0083(10) 0.0009(10) -0.0173(11) 
C44 0.0433(15) 0.0278(13) 0.0294(13) -0.0072(11) -0.0056(11) -0.0187(12) 
C45 0.063(2) 0.0410(16) 0.0303(14) -0.0056(12) -0.0142(13) -0.0296(15) 
C46 0.080(2) 0.0422(17) 0.0333(15) -0.0180(13) -0.0041(15) -0.0326(17) 
C47 0.062(2) 0.0348(15) 0.0414(16) -0.0224(13) 0.0011(14) -0.0177(14) 
C48 0.0408(15) 0.0301(13) 0.0310(14) -0.0137(11) -0.0008(11) -0.0147(12) 
C49 0.0327(13) 0.0220(11) 0.0230(12) -0.0098(10) -0.0040(10) -0.0080(10) 
C50 0.0419(16) 0.0415(16) 0.0341(15) -0.0027(12) -0.0024(12) -0.0189(13) 
C51 0.069(2) 0.0512(19) 0.0407(18) 0.0037(15) -0.0057(16) -0.0329(18) 
C52 0.076(2) 0.0303(15) 0.0402(17) 0.0008(13) -0.0230(16) -0.0151(16) 
C53 0.0455(17) 0.0344(15) 0.0507(18) -0.0185(14) -0.0232(14) 0.0033(13) 
C54 0.0346(14) 0.0315(14) 0.0352(15) -0.0136(12) -0.0047(11) -0.0053(12) 
 
_geom_special_details 
; 
 All esds (except the esd in the dihedral angle between two l.s. planes) 
 are estimated using the full covariance matrix.  The cell esds are taken 
 into account individually in the estimation of esds in distances, angles 
 and torsion angles; correlations between esds in cell parameters are only 
 used when they are defined by crystal symmetry.  An approximate (isotropic) 
 treatment of cell esds is used for estimating esds involving l.s. planes. 
; 
 
loop_ 
 _geom_bond_atom_site_label_1 
 _geom_bond_atom_site_label_2 
 _geom_bond_distance 
 _geom_bond_site_symmetry_2 
 _geom_bond_publ_flag 
Rh1 C38 2.076(2) . ? 
Rh1 C19 2.171(2) . ? 
Rh1 C4 2.185(2) . ? 
Rh1 C20 2.187(2) . ? 
Rh1 C5 2.201(2) . ? 
Rh1 P1 2.2746(9) . ? 
Rh1 P2 2.3819(9) . ? 
P1 C31 1.829(2) . ? 
P1 C16 1.858(2) . ? 
P1 C1 1.874(2) . ? 
P2 C37 1.800(2) . ? 
P2 C49 1.821(2) . ? 
P2 C43 1.832(2) . ? 
C1 C2 1.507(3) . ? 
C1 C7 1.523(3) . ? 
C1 H1 1.0000 . ? 
C2 C8 1.396(3) . ? 
C2 C3 1.406(3) . ? 
C3 C11 1.398(3) . ? 
C3 C4 1.470(3) . ? 
C4 C5 1.414(3) . ? 
C4 H4 1.0000 . ? 
C5 C6 1.481(3) . ? 
C5 H5 1.0000 . ? 
C6 C12 1.399(3) . ? 
C6 C7 1.406(3) . ? 
C7 C15 1.388(3) . ? 
C8 C9 1.385(4) . ? 
C8 H8 0.9500 . ? 
C9 C10 1.378(4) . ? 
C9 H9 0.9500 . ? 
C10 C11 1.383(4) . ? 
C10 H10 0.9500 . ? 
C11 H11 0.9500 . ? 
C12 C13 1.380(3) . ? 
C12 H12 0.9500 . ? 
C13 C14 1.378(4) . ? 
C13 H13 0.9500 . ? 
C14 C15 1.383(3) . ? 
C14 H14 0.9500 . ? 
C15 H15 0.9500 . ? 
C16 C17 1.513(3) . ? 
C16 C22 1.518(3) . ? 
C16 H16 1.0000 . ? 
C17 C23 1.394(3) . ? 
C17 C18 1.406(3) . ? 
C18 C26 1.407(3) . ? 
C18 C19 1.478(3) . ? 
C19 C20 1.424(3) . ? 
C19 H19 1.0000 . ? 
C20 C21 1.479(3) . ? 
C20 H20 1.0000 . ? 
C21 C27 1.398(3) . ? 
C21 C22 1.404(3) . ? 
C22 C30 1.391(3) . ? 
C23 C24 1.383(4) . ? 
C23 H23 0.9500 . ? 
C24 C25 1.376(4) . ? 
C24 H24 0.9500 . ? 
C25 C26 1.382(4) . ? 
C25 H25 0.9500 . ? 
C26 H26 0.9500 . ? 
C27 C28 1.385(3) . ? 
C27 H27 0.9500 . ? 
C28 C29 1.379(4) . ? 
C28 H28 0.9500 . ? 
C29 C30 1.380(4) . ? 
C29 H29 0.9500 . ? 
C30 H30 0.9500 . ? 
C31 C32 1.392(3) . ? 
C31 C36 1.394(3) . ? 
C32 C33 1.384(3) . ? 
C32 H32 0.9500 . ? 
C33 C34 1.378(4) . ? 
C33 H33 0.9500 . ? 
C34 C35 1.377(4) . ? 
C34 H34 0.9500 . ? 
C35 C36 1.387(3) . ? 
C35 H35 0.9500 . ? 
C36 H36 0.9500 . ? 
C37 C42 1.393(3) . ? 
C37 C38 1.405(3) . ? 
C38 C39 1.397(3) . ? 
C39 C40 1.382(3) . ? 
C39 H39 0.9500 . ? 
C40 C41 1.395(3) . ? 
C40 H40 0.9500 . ? 
C41 C42 1.385(3) . ? 
C41 H41 0.9500 . ? 
C42 H42 0.9500 . ? 
C43 C48 1.392(3) . ? 
C43 C44 1.400(3) . ? 
C44 C45 1.388(3) . ? 
C44 H44 0.9500 . ? 
C45 C46 1.372(4) . ? 
C45 H45 0.9500 . ? 
C46 C47 1.380(4) . ? 
C46 H46 0.9500 . ? 
C47 C48 1.387(3) . ? 
C47 H47 0.9500 . ? 
C48 H48 0.9500 . ? 
C49 C50 1.386(3) . ? 
C49 C54 1.390(3) . ? 
C50 C51 1.379(4) . ? 
C50 H50 0.9500 . ? 
C51 C52 1.365(4) . ? 
C51 H51 0.9500 . ? 
C52 C53 1.376(4) . ? 
C52 H52 0.9500 . ? 
C53 C54 1.388(4) . ? 
C53 H53 0.9500 . ? 
C54 H54 0.9500 . ? 
C55 C61 0.82(2) . ? 
C55 C57 1.088(10) . ? 
C55 C59 1.222(17) . ? 
C55 C56 1.33(2) . ? 
C55 C60 1.35(8) . ? 
C55 C58 1.496(19) . ? 
C55 C57 1.606(15) 2_657 ? 
C56 C59 0.83(4) . ? 
C56 C58 0.84(3) . ? 
C56 C61 1.58(4) . ? 
C56 C60 1.83(9) . ? 
C57 C57 1.027(10) 2_657 ? 
C57 C61 1.44(3) 2_657 ? 
C57 C61 1.47(3) . ? 
C57 C55 1.606(15) 2_657 ? 
C57 C60 1.81(8) . ? 
C58 C60 1.49(8) . ? 
C58 C59 1.60(3) . ? 
C59 C61 1.01(2) . ? 
C61 C57 1.44(3) 2_657 ? 
 
loop_ 
 _geom_angle_atom_site_label_1 
 _geom_angle_atom_site_label_2 
 _geom_angle_atom_site_label_3 
 _geom_angle 
 _geom_angle_site_symmetry_1 
 _geom_angle_site_symmetry_3 
 _geom_angle_publ_flag 
C38 Rh1 C19 90.09(9) . . ? 
C38 Rh1 C4 85.83(9) . . ? 
C19 Rh1 C4 133.26(9) . . ? 
C38 Rh1 C20 90.12(9) . . ? 
C19 Rh1 C20 38.14(8) . . ? 
C4 Rh1 C20 95.25(9) . . ? 
C38 Rh1 C5 91.99(9) . . ? 
C19 Rh1 C5 170.29(8) . . ? 
C4 Rh1 C5 37.60(8) . . ? 
C20 Rh1 C5 132.34(8) . . ? 
C38 Rh1 P1 178.87(6) . . ? 
C19 Rh1 P1 90.10(7) . . ? 
C4 Rh1 P1 93.24(7) . . ? 
C20 Rh1 P1 89.34(7) . . ? 
C5 Rh1 P1 87.64(7) . . ? 
C38 Rh1 P2 67.20(7) . . ? 
C19 Rh1 P2 96.02(7) . . ? 
C4 Rh1 P2 124.34(6) . . ? 
C20 Rh1 P2 130.44(6) . . ? 
C5 Rh1 P2 93.52(7) . . ? 
P1 Rh1 P2 113.88(4) . . ? 
C31 P1 C16 103.60(11) . . ? 
C31 P1 C1 98.38(10) . . ? 
C16 P1 C1 108.96(10) . . ? 
C31 P1 Rh1 125.75(8) . . ? 
C16 P1 Rh1 110.71(8) . . ? 
C1 P1 Rh1 108.13(8) . . ? 
C37 P2 C49 109.33(11) . . ? 
C37 P2 C43 107.42(11) . . ? 
C49 P2 C43 102.99(10) . . ? 
C37 P2 Rh1 84.29(8) . . ? 
C49 P2 Rh1 122.43(8) . . ? 
C43 P2 Rh1 126.47(8) . . ? 
C2 C1 C7 112.44(19) . . ? 
C2 C1 P1 114.98(15) . . ? 
C7 C1 P1 104.20(14) . . ? 
C2 C1 H1 108.3 . . ? 
C7 C1 H1 108.3 . . ? 
P1 C1 H1 108.3 . . ? 
C8 C2 C3 119.2(2) . . ? 
C8 C2 C1 119.5(2) . . ? 
C3 C2 C1 121.2(2) . . ? 
C11 C3 C2 118.3(2) . . ? 
C11 C3 C4 117.7(2) . . ? 
C2 C3 C4 124.1(2) . . ? 
C5 C4 C3 127.6(2) . . ? 
C5 C4 Rh1 71.81(13) . . ? 
C3 C4 Rh1 116.98(15) . . ? 
C5 C4 H4 111.4 . . ? 
C3 C4 H4 111.4 . . ? 
Rh1 C4 H4 111.4 . . ? 
C4 C5 C6 125.3(2) . . ? 
C4 C5 Rh1 70.59(13) . . ? 
C6 C5 Rh1 120.40(15) . . ? 
C4 C5 H5 111.5 . . ? 
C6 C5 H5 111.5 . . ? 
Rh1 C5 H5 111.5 . . ? 
C12 C6 C7 117.7(2) . . ? 
C12 C6 C5 118.5(2) . . ? 
C7 C6 C5 123.8(2) . . ? 
C15 C7 C6 119.5(2) . . ? 
C15 C7 C1 119.7(2) . . ? 
C6 C7 C1 120.68(19) . . ? 
C9 C8 C2 121.2(2) . . ? 
C9 C8 H8 119.4 . . ? 
C2 C8 H8 119.4 . . ? 
C10 C9 C8 119.9(2) . . ? 
C10 C9 H9 120.1 . . ? 
C8 C9 H9 120.1 . . ? 
C9 C10 C11 119.5(2) . . ? 
C9 C10 H10 120.2 . . ? 
C11 C10 H10 120.2 . . ? 
C10 C11 C3 121.9(2) . . ? 
C10 C11 H11 119.1 . . ? 
C3 C11 H11 119.1 . . ? 
C13 C12 C6 121.9(2) . . ? 
C13 C12 H12 119.0 . . ? 
C6 C12 H12 119.0 . . ? 
C14 C13 C12 119.8(2) . . ? 
C14 C13 H13 120.1 . . ? 
C12 C13 H13 120.1 . . ? 
C13 C14 C15 119.3(2) . . ? 
C13 C14 H14 120.3 . . ? 
C15 C14 H14 120.3 . . ? 
C14 C15 C7 121.6(2) . . ? 
C14 C15 H15 119.2 . . ? 
C7 C15 H15 119.2 . . ? 
C17 C16 C22 112.15(18) . . ? 
C17 C16 P1 108.27(15) . . ? 
C22 C16 P1 110.39(15) . . ? 
C17 C16 H16 108.7 . . ? 
C22 C16 H16 108.7 . . ? 
P1 C16 H16 108.7 . . ? 
C23 C17 C18 119.4(2) . . ? 
C23 C17 C16 119.3(2) . . ? 
C18 C17 C16 121.2(2) . . ? 
C17 C18 C26 117.7(2) . . ? 
C17 C18 C19 124.6(2) . . ? 
C26 C18 C19 117.7(2) . . ? 
C20 C19 C18 125.0(2) . . ? 
C20 C19 Rh1 71.52(13) . . ? 
C18 C19 Rh1 120.06(15) . . ? 
C20 C19 H19 111.5 . . ? 
C18 C19 H19 111.5 . . ? 
Rh1 C19 H19 111.5 . . ? 
C19 C20 C21 125.7(2) . . ? 
C19 C20 Rh1 70.34(12) . . ? 
C21 C20 Rh1 121.84(15) . . ? 
C19 C20 H20 111.0 . . ? 
C21 C20 H20 111.0 . . ? 
Rh1 C20 H20 111.0 . . ? 
C27 C21 C22 117.6(2) . . ? 
C27 C21 C20 118.1(2) . . ? 
C22 C21 C20 124.2(2) . . ? 
C30 C22 C21 120.2(2) . . ? 
C30 C22 C16 119.0(2) . . ? 
C21 C22 C16 120.8(2) . . ? 
C24 C23 C17 121.6(3) . . ? 
C24 C23 H23 119.2 . . ? 
C17 C23 H23 119.2 . . ? 
C25 C24 C23 119.6(3) . . ? 
C25 C24 H24 120.2 . . ? 
C23 C24 H24 120.2 . . ? 
C24 C25 C26 119.8(3) . . ? 
C24 C25 H25 120.1 . . ? 
C26 C25 H25 120.1 . . ? 
C25 C26 C18 121.8(3) . . ? 
C25 C26 H26 119.1 . . ? 
C18 C26 H26 119.1 . . ? 
C28 C27 C21 121.7(2) . . ? 
C28 C27 H27 119.2 . . ? 
C21 C27 H27 119.2 . . ? 
C29 C28 C27 119.8(2) . . ? 
C29 C28 H28 120.1 . . ? 
C27 C28 H28 120.1 . . ? 
C28 C29 C30 119.7(2) . . ? 
C28 C29 H29 120.1 . . ? 
C30 C29 H29 120.1 . . ? 
C29 C30 C22 120.9(2) . . ? 
C29 C30 H30 119.6 . . ? 
C22 C30 H30 119.6 . . ? 
C32 C31 C36 118.5(2) . . ? 
C32 C31 P1 118.54(17) . . ? 
C36 C31 P1 122.29(18) . . ? 
C33 C32 C31 121.0(2) . . ? 
C33 C32 H32 119.5 . . ? 
C31 C32 H32 119.5 . . ? 
C34 C33 C32 119.9(3) . . ? 
C34 C33 H33 120.1 . . ? 
C32 C33 H33 120.1 . . ? 
C35 C34 C33 120.1(2) . . ? 
C35 C34 H34 120.0 . . ? 
C33 C34 H34 120.0 . . ? 
C34 C35 C36 120.3(2) . . ? 
C34 C35 H35 119.8 . . ? 
C36 C35 H35 119.8 . . ? 
C35 C36 C31 120.3(2) . . ? 
C35 C36 H36 119.9 . . ? 
C31 C36 H36 119.9 . . ? 
C42 C37 C38 122.7(2) . . ? 
C42 C37 P2 136.62(19) . . ? 
C38 C37 P2 100.67(16) . . ? 
C39 C38 C37 117.2(2) . . ? 
C39 C38 Rh1 135.00(17) . . ? 
C37 C38 Rh1 107.76(16) . . ? 
C40 C39 C38 120.8(2) . . ? 
C40 C39 H39 119.6 . . ? 
C38 C39 H39 119.6 . . ? 
C39 C40 C41 120.7(2) . . ? 
C39 C40 H40 119.6 . . ? 
C41 C40 H40 119.6 . . ? 
C42 C41 C40 120.2(2) . . ? 
C42 C41 H41 119.9 . . ? 
C40 C41 H41 119.9 . . ? 
C41 C42 C37 118.4(2) . . ? 
C41 C42 H42 120.8 . . ? 
C37 C42 H42 120.8 . . ? 
C48 C43 C44 118.8(2) . . ? 
C48 C43 P2 121.13(18) . . ? 
C44 C43 P2 119.93(19) . . ? 
C45 C44 C43 119.9(3) . . ? 
C45 C44 H44 120.1 . . ? 
C43 C44 H44 120.1 . . ? 
C46 C45 C44 120.7(3) . . ? 
C46 C45 H45 119.6 . . ? 
C44 C45 H45 119.6 . . ? 
C45 C46 C47 120.0(3) . . ? 
C45 C46 H46 120.0 . . ? 
C47 C46 H46 120.0 . . ? 
C46 C47 C48 120.1(3) . . ? 
C46 C47 H47 119.9 . . ? 
C48 C47 H47 119.9 . . ? 
C47 C48 C43 120.5(2) . . ? 
C47 C48 H48 119.8 . . ? 
C43 C48 H48 119.8 . . ? 
C50 C49 C54 118.7(2) . . ? 
C50 C49 P2 121.8(2) . . ? 
C54 C49 P2 119.52(19) . . ? 
C51 C50 C49 120.5(3) . . ? 
C51 C50 H50 119.8 . . ? 
C49 C50 H50 119.8 . . ? 
C52 C51 C50 120.5(3) . . ? 
C52 C51 H51 119.7 . . ? 
C50 C51 H51 119.7 . . ? 
C51 C52 C53 120.0(3) . . ? 
C51 C52 H52 120.0 . . ? 
C53 C52 H52 120.0 . . ? 
C52 C53 C54 120.1(3) . . ? 
C52 C53 H53 119.9 . . ? 
C54 C53 H53 119.9 . . ? 
C53 C54 C49 120.1(3) . . ? 
C53 C54 H54 119.9 . . ? 
C49 C54 H54 119.9 . . ? 
C61 C55 C57 101(3) . . ? 
C61 C55 C59 55(2) . . ? 
C57 C55 C59 154.4(15) . . ? 
C61 C55 C56 92(3) . . ? 
C57 C55 C56 157.6(19) . . ? 
C59 C55 C56 37.6(16) . . ? 
C61 C55 C60 141(4) . . ? 
C57 C55 C60 96(4) . . ? 
C59 C55 C60 109(4) . . ? 
C56 C55 C60 86(4) . . ? 
C61 C55 C58 126(3) . . ? 
C57 C55 C58 129.3(14) . . ? 
C59 C55 C58 71.4(12) . . ? 
C56 C55 C58 34.0(16) . . ? 
C60 C55 C58 63(3) . . ? 
C61 C55 C57 63(2) . 2_657 ? 
C57 C55 C57 39.2(7) . 2_657 ? 
C59 C55 C57 118.4(13) . 2_657 ? 
C56 C55 C57 154(2) . 2_657 ? 
C60 C55 C57 117(4) . 2_657 ? 
C58 C55 C57 167.8(12) . 2_657 ? 
C59 C56 C58 147(4) . . ? 
C59 C56 C55 64(2) . . ? 
C58 C56 C55 84(2) . . ? 
C59 C56 C61 34.4(17) . . ? 
C58 C56 C61 115(3) . . ? 
C55 C56 C61 31.1(11) . . ? 
C59 C56 C60 96(3) . . ? 
C58 C56 C60 53(3) . . ? 
C55 C56 C60 47(3) . . ? 
C61 C56 C60 73(3) . . ? 
C57 C57 C55 98.8(11) 2_657 . ? 
C57 C57 C61 71.3(11) 2_657 2_657 ? 
C55 C57 C61 166.0(12) . 2_657 ? 
C57 C57 C61 67.4(11) 2_657 . ? 
C55 C57 C61 33.0(11) . . ? 
C61 C57 C61 138.7(9) 2_657 . ? 
C57 C57 C55 42.0(6) 2_657 2_657 ? 
C55 C57 C55 140.8(7) . 2_657 ? 
C61 C57 C55 30.5(9) 2_657 2_657 ? 
C61 C57 C55 108.8(10) . 2_657 ? 
C57 C57 C60 123(3) 2_657 . ? 
C55 C57 C60 48(3) . . ? 
C61 C57 C60 129(3) 2_657 . ? 
C61 C57 C60 76(3) . . ? 
C55 C57 C60 143(3) 2_657 . ? 
C56 C58 C60 100(4) . . ? 
C56 C58 C55 62(2) . . ? 
C60 C58 C55 54(3) . . ? 
C56 C58 C59 16(2) . . ? 
C60 C58 C59 85(3) . . ? 
C55 C58 C59 46.3(8) . . ? 
C56 C59 C61 118(3) . . ? 
C56 C59 C55 78(2) . . ? 
C61 C59 C55 41.5(14) . . ? 
C56 C59 C58 17(2) . . ? 
C61 C59 C58 103.1(19) . . ? 
C55 C59 C58 62.3(9) . . ? 
C55 C60 C58 64(4) . . ? 
C55 C60 C57 37(2) . . ? 
C58 C60 C57 90(4) . . ? 
C55 C60 C56 47(3) . . ? 
C58 C60 C56 27.0(19) . . ? 
C57 C60 C56 81(4) . . ? 
C55 C61 C59 83(3) . . ? 
C55 C61 C57 86(2) . 2_657 ? 
C59 C61 C57 169(3) . 2_657 ? 
C55 C61 C57 46.5(18) . . ? 
C59 C61 C57 129(3) . . ? 
C57 C61 C57 41.3(9) 2_657 . ? 
C55 C61 C56 57(2) . . ? 
C59 C61 C56 27.5(16) . . ? 
C57 C61 C56 143(2) 2_657 . ? 
C57 C61 C56 102(2) . . ? 
 
loop_ 
 _geom_torsion_atom_site_label_1 
 _geom_torsion_atom_site_label_2 
 _geom_torsion_atom_site_label_3 
 _geom_torsion_atom_site_label_4 
 _geom_torsion 
 _geom_torsion_site_symmetry_1 
 _geom_torsion_site_symmetry_2 
 _geom_torsion_site_symmetry_3 
 _geom_torsion_site_symmetry_4 
 _geom_torsion_publ_flag 
C38 Rh1 P1 C31 153(3) . . . . ? 
C19 Rh1 P1 C31 -107.35(11) . . . . ? 
C4 Rh1 P1 C31 119.29(11) . . . . ? 
C20 Rh1 P1 C31 -145.49(11) . . . . ? 
C5 Rh1 P1 C31 82.09(11) . . . . ? 
P2 Rh1 P1 C31 -10.72(9) . . . . ? 
C38 Rh1 P1 C16 -81(3) . . . . ? 
C19 Rh1 P1 C16 18.23(10) . . . . ? 
C4 Rh1 P1 C16 -115.13(10) . . . . ? 
C20 Rh1 P1 C16 -19.91(10) . . . . ? 
C5 Rh1 P1 C16 -152.33(10) . . . . ? 
P2 Rh1 P1 C16 114.86(9) . . . . ? 
C38 Rh1 P1 C1 38(3) . . . . ? 
C19 Rh1 P1 C1 137.52(9) . . . . ? 
C4 Rh1 P1 C1 4.17(9) . . . . ? 
C20 Rh1 P1 C1 99.38(10) . . . . ? 
C5 Rh1 P1 C1 -33.04(9) . . . . ? 
P2 Rh1 P1 C1 -125.84(8) . . . . ? 
C38 Rh1 P2 C37 -1.54(9) . . . . ? 
C19 Rh1 P2 C37 -89.09(10) . . . . ? 
C4 Rh1 P2 C37 65.96(11) . . . . ? 
C20 Rh1 P2 C37 -70.73(11) . . . . ? 
C5 Rh1 P2 C37 89.14(10) . . . . ? 
P1 Rh1 P2 C37 178.12(7) . . . . ? 
C38 Rh1 P2 C49 107.77(12) . . . . ? 
C19 Rh1 P2 C49 20.21(11) . . . . ? 
C4 Rh1 P2 C49 175.26(11) . . . . ? 
C20 Rh1 P2 C49 38.57(12) . . . . ? 
C5 Rh1 P2 C49 -161.55(11) . . . . ? 
P1 Rh1 P2 C49 -72.58(10) . . . . ? 
C38 Rh1 P2 C43 -109.01(12) . . . . ? 
C19 Rh1 P2 C43 163.44(12) . . . . ? 
C4 Rh1 P2 C43 -41.52(13) . . . . ? 
C20 Rh1 P2 C43 -178.20(12) . . . . ? 
C5 Rh1 P2 C43 -18.33(12) . . . . ? 
P1 Rh1 P2 C43 70.65(11) . . . . ? 
C31 P1 C1 C2 178.65(17) . . . . ? 
C16 P1 C1 C2 71.08(18) . . . . ? 
Rh1 P1 C1 C2 -49.32(17) . . . . ? 
C31 P1 C1 C7 -57.84(16) . . . . ? 
C16 P1 C1 C7 -165.40(14) . . . . ? 
Rh1 P1 C1 C7 74.20(14) . . . . ? 
C7 C1 C2 C8 117.3(2) . . . . ? 
P1 C1 C2 C8 -123.6(2) . . . . ? 
C7 C1 C2 C3 -61.3(3) . . . . ? 
P1 C1 C2 C3 57.7(3) . . . . ? 
C8 C2 C3 C11 2.2(3) . . . . ? 
C1 C2 C3 C11 -179.2(2) . . . . ? 
C8 C2 C3 C4 -179.2(2) . . . . ? 
C1 C2 C3 C4 -0.6(3) . . . . ? 
C11 C3 C4 C5 -148.4(2) . . . . ? 
C2 C3 C4 C5 32.9(3) . . . . ? 
C11 C3 C4 Rh1 124.42(19) . . . . ? 
C2 C3 C4 Rh1 -54.2(3) . . . . ? 
C38 Rh1 C4 C5 98.73(14) . . . . ? 
C19 Rh1 C4 C5 -175.09(13) . . . . ? 
C20 Rh1 C4 C5 -171.53(13) . . . . ? 
P1 Rh1 C4 C5 -81.90(12) . . . . ? 
P2 Rh1 C4 C5 40.09(15) . . . . ? 
C38 Rh1 C4 C3 -137.63(17) . . . . ? 
C19 Rh1 C4 C3 -51.5(2) . . . . ? 
C20 Rh1 C4 C3 -47.89(17) . . . . ? 
C5 Rh1 C4 C3 123.6(2) . . . . ? 
P1 Rh1 C4 C3 41.74(16) . . . . ? 
P2 Rh1 C4 C3 163.73(13) . . . . ? 
C3 C4 C5 C6 3.6(4) . . . . ? 
Rh1 C4 C5 C6 114.1(2) . . . . ? 
C3 C4 C5 Rh1 -110.5(2) . . . . ? 
C38 Rh1 C5 C4 -80.53(14) . . . . ? 
C19 Rh1 C5 C4 21.7(5) . . . . ? 
C20 Rh1 C5 C4 11.45(18) . . . . ? 
P1 Rh1 C5 C4 98.40(13) . . . . ? 
P2 Rh1 C5 C4 -147.81(12) . . . . ? 
C38 Rh1 C5 C6 159.20(17) . . . . ? 
C19 Rh1 C5 C6 -98.6(5) . . . . ? 
C4 Rh1 C5 C6 -120.3(2) . . . . ? 
C20 Rh1 C5 C6 -108.82(18) . . . . ? 
P1 Rh1 C5 C6 -21.87(16) . . . . ? 
P2 Rh1 C5 C6 91.92(17) . . . . ? 
C4 C5 C6 C12 146.6(2) . . . . ? 
Rh1 C5 C6 C12 -126.63(19) . . . . ? 
C4 C5 C6 C7 -31.3(3) . . . . ? 
Rh1 C5 C6 C7 55.5(3) . . . . ? 
C12 C6 C7 C15 -4.5(3) . . . . ? 
C5 C6 C7 C15 173.4(2) . . . . ? 
C12 C6 C7 C1 171.1(2) . . . . ? 
C5 C6 C7 C1 -11.0(3) . . . . ? 
C2 C1 C7 C15 -114.8(2) . . . . ? 
P1 C1 C7 C15 120.0(2) . . . . ? 
C2 C1 C7 C6 69.5(3) . . . . ? 
P1 C1 C7 C6 -55.6(2) . . . . ? 
C3 C2 C8 C9 -0.7(3) . . . . ? 
C1 C2 C8 C9 -179.4(2) . . . . ? 
C2 C8 C9 C10 -0.9(4) . . . . ? 
C8 C9 C10 C11 1.0(4) . . . . ? 
C9 C10 C11 C3 0.5(4) . . . . ? 
C2 C3 C11 C10 -2.1(3) . . . . ? 
C4 C3 C11 C10 179.2(2) . . . . ? 
C7 C6 C12 C13 3.8(3) . . . . ? 
C5 C6 C12 C13 -174.2(2) . . . . ? 
C6 C12 C13 C14 -0.5(4) . . . . ? 
C12 C13 C14 C15 -2.2(4) . . . . ? 
C13 C14 C15 C7 1.3(4) . . . . ? 
C6 C7 C15 C14 2.1(4) . . . . ? 
C1 C7 C15 C14 -173.6(2) . . . . ? 
C31 P1 C16 C17 75.83(17) . . . . ? 
C1 P1 C16 C17 179.81(15) . . . . ? 
Rh1 P1 C16 C17 -61.40(16) . . . . ? 
C31 P1 C16 C22 -161.06(15) . . . . ? 
C1 P1 C16 C22 -57.08(18) . . . . ? 
Rh1 P1 C16 C22 61.71(16) . . . . ? 
C22 C16 C17 C23 116.1(2) . . . . ? 
P1 C16 C17 C23 -121.8(2) . . . . ? 
C22 C16 C17 C18 -63.1(3) . . . . ? 
P1 C16 C17 C18 59.0(2) . . . . ? 
C23 C17 C18 C26 0.2(3) . . . . ? 
C16 C17 C18 C26 179.4(2) . . . . ? 
C23 C17 C18 C19 -179.2(2) . . . . ? 
C16 C17 C18 C19 0.0(3) . . . . ? 
C17 C18 C19 C20 35.7(3) . . . . ? 
C26 C18 C19 C20 -143.7(2) . . . . ? 
C17 C18 C19 Rh1 -51.9(3) . . . . ? 
C26 C18 C19 Rh1 128.69(19) . . . . ? 
C38 Rh1 C19 C20 90.09(14) . . . . ? 
C4 Rh1 C19 C20 5.74(18) . . . . ? 
C5 Rh1 C19 C20 -12.3(5) . . . . ? 
P1 Rh1 C19 C20 -88.80(13) . . . . ? 
P2 Rh1 C19 C20 157.16(12) . . . . ? 
C38 Rh1 C19 C18 -149.62(18) . . . . ? 
C4 Rh1 C19 C18 126.04(17) . . . . ? 
C20 Rh1 C19 C18 120.3(2) . . . . ? 
C5 Rh1 C19 C18 108.0(5) . . . . ? 
P1 Rh1 C19 C18 31.49(17) . . . . ? 
P2 Rh1 C19 C18 -82.54(17) . . . . ? 
C18 C19 C20 C21 1.4(3) . . . . ? 
Rh1 C19 C20 C21 115.7(2) . . . . ? 
C18 C19 C20 Rh1 -114.2(2) . . . . ? 
C38 Rh1 C20 C19 -89.98(14) . . . . ? 
C4 Rh1 C20 C19 -175.80(13) . . . . ? 
C5 Rh1 C20 C19 177.21(12) . . . . ? 
P1 Rh1 C20 C19 91.01(13) . . . . ? 
P2 Rh1 C20 C19 -30.47(16) . . . . ? 
C38 Rh1 C20 C21 149.50(19) . . . . ? 
C19 Rh1 C20 C21 -120.5(2) . . . . ? 
C4 Rh1 C20 C21 63.68(19) . . . . ? 
C5 Rh1 C20 C21 56.7(2) . . . . ? 
P1 Rh1 C20 C21 -29.51(18) . . . . ? 
P2 Rh1 C20 C21 -150.98(15) . . . . ? 
C19 C20 C21 C27 144.0(2) . . . . ? 
Rh1 C20 C21 C27 -128.36(19) . . . . ? 
C19 C20 C21 C22 -35.5(3) . . . . ? 
Rh1 C20 C21 C22 52.1(3) . . . . ? 
C27 C21 C22 C30 -2.9(3) . . . . ? 
C20 C21 C22 C30 176.6(2) . . . . ? 
C27 C21 C22 C16 176.7(2) . . . . ? 
C20 C21 C22 C16 -3.8(3) . . . . ? 
C17 C16 C22 C30 -115.0(2) . . . . ? 
P1 C16 C22 C30 124.2(2) . . . . ? 
C17 C16 C22 C21 65.5(3) . . . . ? 
P1 C16 C22 C21 -55.4(2) . . . . ? 
C18 C17 C23 C24 0.2(4) . . . . ? 
C16 C17 C23 C24 -179.0(2) . . . . ? 
C17 C23 C24 C25 -0.4(4) . . . . ? 
C23 C24 C25 C26 0.1(4) . . . . ? 
C24 C25 C26 C18 0.3(4) . . . . ? 
C17 C18 C26 C25 -0.5(3) . . . . ? 
C19 C18 C26 C25 179.0(2) . . . . ? 
C22 C21 C27 C28 2.0(3) . . . . ? 
C20 C21 C27 C28 -177.5(2) . . . . ? 
C21 C27 C28 C29 0.3(4) . . . . ? 
C27 C28 C29 C30 -1.9(4) . . . . ? 
C28 C29 C30 C22 1.0(4) . . . . ? 
C21 C22 C30 C29 1.4(4) . . . . ? 
C16 C22 C30 C29 -178.2(2) . . . . ? 
C16 P1 C31 C32 -144.76(19) . . . . ? 
C1 P1 C31 C32 103.31(19) . . . . ? 
Rh1 P1 C31 C32 -16.3(2) . . . . ? 
C16 P1 C31 C36 44.9(2) . . . . ? 
C1 P1 C31 C36 -67.0(2) . . . . ? 
Rh1 P1 C31 C36 173.44(15) . . . . ? 
C36 C31 C32 C33 0.1(4) . . . . ? 
P1 C31 C32 C33 -170.6(2) . . . . ? 
C31 C32 C33 C34 0.7(4) . . . . ? 
C32 C33 C34 C35 -0.6(4) . . . . ? 
C33 C34 C35 C36 -0.4(4) . . . . ? 
C34 C35 C36 C31 1.2(4) . . . . ? 
C32 C31 C36 C35 -1.0(3) . . . . ? 
P1 C31 C36 C35 169.26(19) . . . . ? 
C49 P2 C37 C42 60.8(3) . . . . ? 
C43 P2 C37 C42 -50.3(3) . . . . ? 
Rh1 P2 C37 C42 -176.8(3) . . . . ? 
C49 P2 C37 C38 -120.29(15) . . . . ? 
C43 P2 C37 C38 128.63(15) . . . . ? 
Rh1 P2 C37 C38 2.13(13) . . . . ? 
C42 C37 C38 C39 -1.4(3) . . . . ? 
P2 C37 C38 C39 179.49(17) . . . . ? 
C42 C37 C38 Rh1 176.59(19) . . . . ? 
P2 C37 C38 Rh1 -2.56(16) . . . . ? 
C19 Rh1 C38 C39 -84.0(2) . . . . ? 
C4 Rh1 C38 C39 49.4(2) . . . . ? 
C20 Rh1 C38 C39 -45.9(2) . . . . ? 
C5 Rh1 C38 C39 86.5(2) . . . . ? 
P1 Rh1 C38 C39 16(3) . . . . ? 
P2 Rh1 C38 C39 179.5(2) . . . . ? 
C19 Rh1 C38 C37 98.56(16) . . . . ? 
C4 Rh1 C38 C37 -128.05(16) . . . . ? 
C20 Rh1 C38 C37 136.70(16) . . . . ? 
C5 Rh1 C38 C37 -90.92(16) . . . . ? 
P1 Rh1 C38 C37 -162(3) . . . . ? 
P2 Rh1 C38 C37 2.06(13) . . . . ? 
C37 C38 C39 C40 0.0(3) . . . . ? 
Rh1 C38 C39 C40 -177.26(18) . . . . ? 
C38 C39 C40 C41 0.8(4) . . . . ? 
C39 C40 C41 C42 -0.3(4) . . . . ? 
C40 C41 C42 C37 -1.0(4) . . . . ? 
C38 C37 C42 C41 1.9(4) . . . . ? 
P2 C37 C42 C41 -179.3(2) . . . . ? 
C37 P2 C43 C48 158.05(19) . . . . ? 
C49 P2 C43 C48 42.7(2) . . . . ? 
Rh1 P2 C43 C48 -106.08(19) . . . . ? 
C37 P2 C43 C44 -26.4(2) . . . . ? 
C49 P2 C43 C44 -141.8(2) . . . . ? 
Rh1 P2 C43 C44 69.5(2) . . . . ? 
C48 C43 C44 C45 1.3(4) . . . . ? 
P2 C43 C44 C45 -174.36(19) . . . . ? 
C43 C44 C45 C46 -0.4(4) . . . . ? 
C44 C45 C46 C47 -0.9(4) . . . . ? 
C45 C46 C47 C48 1.2(4) . . . . ? 
C46 C47 C48 C43 -0.3(4) . . . . ? 
C44 C43 C48 C47 -1.0(4) . . . . ? 
P2 C43 C48 C47 174.6(2) . . . . ? 
C37 P2 C49 C50 -25.4(2) . . . . ? 
C43 P2 C49 C50 88.5(2) . . . . ? 
Rh1 P2 C49 C50 -121.1(2) . . . . ? 
C37 P2 C49 C54 154.05(19) . . . . ? 
C43 P2 C49 C54 -92.0(2) . . . . ? 
Rh1 P2 C49 C54 58.4(2) . . . . ? 
C54 C49 C50 C51 0.9(4) . . . . ? 
P2 C49 C50 C51 -179.6(2) . . . . ? 
C49 C50 C51 C52 0.7(5) . . . . ? 
C50 C51 C52 C53 -1.4(5) . . . . ? 
C51 C52 C53 C54 0.6(5) . . . . ? 
C52 C53 C54 C49 1.0(4) . . . . ? 
C50 C49 C54 C53 -1.8(4) . . . . ? 
P2 C49 C54 C53 178.7(2) . . . . ? 
C61 C55 C56 C59 -13(3) . . . . ? 
C57 C55 C56 C59 -137(5) . . . . ? 
C60 C55 C56 C59 128(4) . . . . ? 
C58 C55 C56 C59 172(3) . . . . ? 
C57 C55 C56 C59 -26(4) 2_657 . . . ? 
C61 C55 C56 C58 175(3) . . . . ? 
C57 C55 C56 C58 51(6) . . . . ? 
C59 C55 C56 C58 -172(3) . . . . ? 
C60 C55 C56 C58 -44(4) . . . . ? 
C57 C55 C56 C58 162(2) 2_657 . . . ? 
C57 C55 C56 C61 -124(6) . . . . ? 
C59 C55 C56 C61 13(3) . . . . ? 
C60 C55 C56 C61 141(4) . . . . ? 
C58 C55 C56 C61 -175(3) . . . . ? 
C57 C55 C56 C61 -13(3) 2_657 . . . ? 
C61 C55 C56 C60 -141(4) . . . . ? 
C57 C55 C56 C60 95(6) . . . . ? 
C59 C55 C56 C60 -128(4) . . . . ? 
C58 C55 C56 C60 44(4) . . . . ? 
C57 C55 C56 C60 -154(5) 2_657 . . . ? 
C61 C55 C57 C57 18(2) . . . 2_657 ? 
C59 C55 C57 C57 35(3) . . . 2_657 ? 
C56 C55 C57 C57 140(5) . . . 2_657 ? 
C60 C55 C57 C57 -127(4) . . . 2_657 ? 
C58 C55 C57 C57 174.2(12) . . . 2_657 ? 
C61 C55 C57 C61 62(6) . . . 2_657 ? 
C59 C55 C57 C61 79(6) . . . 2_657 ? 
C56 C55 C57 C61 -176(6) . . . 2_657 ? 
C60 C55 C57 C61 -82(6) . . . 2_657 ? 
C58 C55 C57 C61 -142(4) . . . 2_657 ? 
C57 C55 C57 C61 44(4) 2_657 . . 2_657 ? 
C59 C55 C57 C61 18(3) . . . . ? 
C56 C55 C57 C61 122(6) . . . . ? 
C60 C55 C57 C61 -144(4) . . . . ? 
C58 C55 C57 C61 157(3) . . . . ? 
C57 C55 C57 C61 -18(2) 2_657 . . . ? 
C61 C55 C57 C55 18(2) . . . 2_657 ? 
C59 C55 C57 C55 35(3) . . . 2_657 ? 
C56 C55 C57 C55 140(5) . . . 2_657 ? 
C60 C55 C57 C55 -127(4) . . . 2_657 ? 
C58 C55 C57 C55 174.2(12) . . . 2_657 ? 
C57 C55 C57 C55 0.000(2) 2_657 . . 2_657 ? 
C61 C55 C57 C60 144(4) . . . . ? 
C59 C55 C57 C60 162(5) . . . . ? 
C56 C55 C57 C60 -94(6) . . . . ? 
C58 C55 C57 C60 -59(3) . . . . ? 
C57 C55 C57 C60 127(4) 2_657 . . . ? 
C59 C56 C58 C60 26(8) . . . . ? 
C55 C56 C58 C60 40(3) . . . . ? 
C61 C56 C58 C60 42(4) . . . . ? 
C59 C56 C58 C55 -14(6) . . . . ? 
C61 C56 C58 C55 2.8(15) . . . . ? 
C60 C56 C58 C55 -40(3) . . . . ? 
C55 C56 C58 C59 14(6) . . . . ? 
C61 C56 C58 C59 16(5) . . . . ? 
C60 C56 C58 C59 -26(8) . . . . ? 
C61 C55 C58 C56 -6(3) . . . . ? 
C57 C55 C58 C56 -157(2) . . . . ? 
C59 C55 C58 C56 5(2) . . . . ? 
C60 C55 C58 C56 129(4) . . . . ? 
C57 C55 C58 C56 -140(5) 2_657 . . . ? 
C61 C55 C58 C60 -135(5) . . . . ? 
C57 C55 C58 C60 74(4) . . . . ? 
C59 C55 C58 C60 -124(4) . . . . ? 
C56 C55 C58 C60 -129(4) . . . . ? 
C57 C55 C58 C60 91(6) 2_657 . . . ? 
C61 C55 C58 C59 -11(2) . . . . ? 
C57 C55 C58 C59 -162.6(16) . . . . ? 
C56 C55 C58 C59 -5(2) . . . . ? 
C60 C55 C58 C59 124(4) . . . . ? 
C57 C55 C58 C59 -145(5) 2_657 . . . ? 
C58 C56 C59 C61 27(8) . . . . ? 
C55 C56 C59 C61 12(2) . . . . ? 
C60 C56 C59 C61 48(4) . . . . ? 
C58 C56 C59 C55 15(6) . . . . ? 
C61 C56 C59 C55 -12(2) . . . . ? 
C60 C56 C59 C55 36(3) . . . . ? 
C55 C56 C59 C58 -15(6) . . . . ? 
C61 C56 C59 C58 -27(8) . . . . ? 
C60 C56 C59 C58 21(6) . . . . ? 
C61 C55 C59 C56 164(3) . . . . ? 
C57 C55 C59 C56 143(3) . . . . ? 
C60 C55 C59 C56 -56(4) . . . . ? 
C58 C55 C59 C56 -5(2) . . . . ? 
C57 C55 C59 C56 167.3(18) 2_657 . . . ? 
C57 C55 C59 C61 -21(3) . . . . ? 
C56 C55 C59 C61 -164(3) . . . . ? 
C60 C55 C59 C61 140(4) . . . . ? 
C58 C55 C59 C61 -169(2) . . . . ? 
C57 C55 C59 C61 3(2) 2_657 . . . ? 
C61 C55 C59 C58 169(2) . . . . ? 
C57 C55 C59 C58 148(3) . . . . ? 
C56 C55 C59 C58 5(2) . . . . ? 
C60 C55 C59 C58 -51(4) . . . . ? 
C57 C55 C59 C58 172.1(10) 2_657 . . . ? 
C60 C58 C59 C56 -154(8) . . . . ? 
C55 C58 C59 C56 163(7) . . . . ? 
C56 C58 C59 C61 -156(7) . . . . ? 
C60 C58 C59 C61 50(3) . . . . ? 
C55 C58 C59 C61 7.6(16) . . . . ? 
C56 C58 C59 C55 -163(7) . . . . ? 
C60 C58 C59 C55 42(3) . . . . ? 
C61 C55 C60 C58 114(6) . . . . ? 
C57 C55 C60 C58 -131.7(19) . . . . ? 
C59 C55 C60 C58 56(3) . . . . ? 
C56 C55 C60 C58 26(2) . . . . ? 
C57 C55 C60 C58 -166.3(14) 2_657 . . . ? 
C61 C55 C60 C57 -114(6) . . . . ? 
C59 C55 C60 C57 -172(2) . . . . ? 
C56 C55 C60 C57 158(2) . . . . ? 
C58 C55 C60 C57 131.7(19) . . . . ? 
C57 C55 C60 C57 -34.6(16) 2_657 . . . ? 
C61 C55 C60 C56 88(6) . . . . ? 
C57 C55 C60 C56 -158(2) . . . . ? 
C59 C55 C60 C56 31(2) . . . . ? 
C58 C55 C60 C56 -26(2) . . . . ? 
C57 C55 C60 C56 168(2) 2_657 . . . ? 
C56 C58 C60 C55 -44(3) . . . . ? 
C59 C58 C60 C55 -37(2) . . . . ? 
C56 C58 C60 C57 -71(3) . . . . ? 
C55 C58 C60 C57 -26.5(14) . . . . ? 
C59 C58 C60 C57 -64(2) . . . . ? 
C55 C58 C60 C56 44(3) . . . . ? 
C59 C58 C60 C56 7(2) . . . . ? 
C57 C57 C60 C55 70(4) 2_657 . . . ? 
C61 C57 C60 C55 162.0(17) 2_657 . . . ? 
C61 C57 C60 C55 19(2) . . . . ? 
C55 C57 C60 C55 122(3) 2_657 . . . ? 
C57 C57 C60 C58 112(3) 2_657 . . . ? 
C55 C57 C60 C58 42(2) . . . . ? 
C61 C57 C60 C58 -156(2) 2_657 . . . ? 
C61 C57 C60 C58 61(3) . . . . ? 
C55 C57 C60 C58 164.2(17) 2_657 . . . ? 
C57 C57 C60 C56 87(3) 2_657 . . . ? 
C55 C57 C60 C56 16.2(17) . . . . ? 
C61 C57 C60 C56 178(2) 2_657 . . . ? 
C61 C57 C60 C56 35(2) . . . . ? 
C55 C57 C60 C56 138(3) 2_657 . . . ? 
C59 C56 C60 C55 -46(3) . . . . ? 
C58 C56 C60 C55 121(4) . . . . ? 
C61 C56 C60 C55 -20(2) . . . . ? 
C59 C56 C60 C58 -166(4) . . . . ? 
C55 C56 C60 C58 -121(4) . . . . ? 
C61 C56 C60 C58 -140(4) . . . . ? 
C59 C56 C60 C57 -59(3) . . . . ? 
C58 C56 C60 C57 107(4) . . . . ? 
C55 C56 C60 C57 -13.3(13) . . . . ? 
C61 C56 C60 C57 -33(2) . . . . ? 
C57 C55 C61 C59 170.9(12) . . . . ? 
C56 C55 C61 C59 9.7(18) . . . . ? 
C60 C55 C61 C59 -76(7) . . . . ? 
C58 C55 C61 C59 13(3) . . . . ? 
C57 C55 C61 C59 -176.8(19) 2_657 . . . ? 
C57 C55 C61 C57 -12.4(15) . . . 2_657 ? 
C59 C55 C61 C57 176.8(19) . . . 2_657 ? 
C56 C55 C61 C57 -173.6(11) . . . 2_657 ? 
C60 C55 C61 C57 100(7) . . . 2_657 ? 
C58 C55 C61 C57 -170.2(14) . . . 2_657 ? 
C59 C55 C61 C57 -170.9(12) . . . . ? 
C56 C55 C61 C57 -161.2(16) . . . . ? 
C60 C55 C61 C57 113(7) . . . . ? 
C58 C55 C61 C57 -158(3) . . . . ? 
C57 C55 C61 C57 12.4(15) 2_657 . . . ? 
C57 C55 C61 C56 161.2(16) . . . . ? 
C59 C55 C61 C56 -9.7(18) . . . . ? 
C60 C55 C61 C56 -86(7) . . . . ? 
C58 C55 C61 C56 3.4(19) . . . . ? 
C57 C55 C61 C56 173.6(11) 2_657 . . . ? 
C56 C59 C61 C55 -18(3) . . . . ? 
C58 C59 C61 C55 -10(2) . . . . ? 
C56 C59 C61 C57 -35(13) . . . 2_657 ? 
C55 C59 C61 C57 -17(11) . . . 2_657 ? 
C58 C59 C61 C57 -27(13) . . . 2_657 ? 
C56 C59 C61 C57 -9(4) . . . . ? 
C55 C59 C61 C57 8.5(11) . . . . ? 
C58 C59 C61 C57 -2(3) . . . . ? 
C55 C59 C61 C56 18(3) . . . . ? 
C58 C59 C61 C56 8(2) . . . . ? 
C57 C57 C61 C55 -161(2) 2_657 . . . ? 
C61 C57 C61 C55 -161(2) 2_657 . . . ? 
C55 C57 C61 C55 -168.3(15) 2_657 . . . ? 
C60 C57 C61 C55 -26(3) . . . . ? 
C57 C57 C61 C59 -173(3) 2_657 . . . ? 
C55 C57 C61 C59 -11.7(15) . . . . ? 
C61 C57 C61 C59 -173(3) 2_657 . . . ? 
C55 C57 C61 C59 180(2) 2_657 . . . ? 
C60 C57 C61 C59 -38(4) . . . . ? 
C55 C57 C61 C57 161(2) . . . 2_657 ? 
C61 C57 C61 C57 0.000(4) 2_657 . . 2_657 ? 
C55 C57 C61 C57 -7.2(9) 2_657 . . 2_657 ? 
C60 C57 C61 C57 135(3) . . . 2_657 ? 
C57 C57 C61 C56 -177.1(16) 2_657 . . . ? 
C55 C57 C61 C56 -16.0(15) . . . . ? 
C61 C57 C61 C56 -177.1(16) 2_657 . . . ? 
C55 C57 C61 C56 175.6(10) 2_657 . . . ? 
C60 C57 C61 C56 -42(3) . . . . ? 
C59 C56 C61 C55 159(4) . . . . ? 
C58 C56 C61 C55 -5(3) . . . . ? 
C60 C56 C61 C55 29(3) . . . . ? 
C58 C56 C61 C59 -164(5) . . . . ? 
C55 C56 C61 C59 -159(4) . . . . ? 
C60 C56 C61 C59 -130(4) . . . . ? 
C59 C56 C61 C57 170(4) . . . 2_657 ? 
C58 C56 C61 C57 5(4) . . . 2_657 ? 
C55 C56 C61 C57 10.7(18) . . . 2_657 ? 
C60 C56 C61 C57 40(4) . . . 2_657 ? 
C59 C56 C61 C57 173(3) . . . . ? 
C58 C56 C61 C57 8(3) . . . . ? 
C55 C56 C61 C57 13.8(13) . . . . ? 
C60 C56 C61 C57 43(3) . . . . ? 
 
_diffrn_measured_fraction_theta_max    0.992 
_diffrn_reflns_theta_full              28.31 
_diffrn_measured_fraction_theta_full   0.992 
_refine_diff_density_max    0.647 
_refine_diff_density_min   -0.457 
_refine_diff_density_rms    0.091 
